# Supplementary material
Source: publisher site journal article supplement (https://www.dovepress.com/get_supplementary_file.php?f=476484.docx)
Supplement: Supplementary file 1 [file get_supplementary_file.php]

Supplement 1 Scenario description

Version for adult patient version:

1) MBC instructions

The following is a short scenario describing a patient and his clinician using a “Measurement-based Care (MBC)" intervention. Please read the scenario before answering the questions:

Three months ago, Mr. Hui began to experience emotional discomfort due to work pressure, which seriously affected his work. Today, Mr. Hui went to the local mental health center for a consultation and got an appointment with Dr. Zhang, a psychiatrist. During the consultation, Dr. Zhang suggested that Mr. Hui complete a scale to assess the severity of depressive symptoms, which takes about 5 minutes. Mr. Hui scored 17 points on the scale. Dr. Zhang explained to Mr. Hui in detail that the result indicated that Mr. Hui was suffering from moderate depression. Dr. Zhang provided Mr. Hui with some general information about MDD, prescribed an antidepressant, and advised him to make a follow-up appointment in three weeks.

When Mr. Hui returned for his follow-up appointment within three weeks, the clinic receptionist first gave him a scale in the waiting room and asked Mr. Hui to show the scale results to Dr. Zhang during the consultation. During the consultation, Mr. Hui and Dr. Zhang reviewed the results and discussed changes in symptoms and side effects of medications. Since Mr. Hui felt that the medication's side effects were bothering him, they discussed changing the medication.

2) eMBC instructions

The following is a short scenario describing a patient and his clinician using an “enhanced measurement-based care(eMBC)” intervention Please read the scenario before answering the questions:

Two months ago, Ms. Li felt that her emotional distress was getting worse. She went to a mental health center and visited Dr. Wang, a psychiatrist, for an outpatient appointment. During the appointment, Dr. Wang asked Ms. Li to complete a scale to assess depressive symptom severity, which takes about 5 minutes. Ms. Li scored 14 on the scale. Dr. Wang explained to Ms. Li that the results indicated that she was suffering from moderate depression. At the same time, Dr. Wang provided Ms. Li with some general information about MDD and prescribed an antidepressant. Afterward, Dr. Wang showed Ms. Li a smartphone app that would allow her to re-evaluate the same scale and save the results.

Dr. Wang asked Ms. Li to make an appointment for a follow-up consultation within three weeks and to use the mobile app to re-evaluate the scale before the consultation on that day. During the follow-up consultation, Ms. Li used her mobile phone to show Dr. Wang the scale scores. They discussed the changes in Ms. Li's symptoms, medication side effects, and the next treatment plan together.

Version for adolescents and family members

1) MBC instructions

The following is a short scenario describing a patient and his clinician using a “Measurement-based Care (MBC)" intervention. Please read the scenario before answering the questions:

Three months ago, Hui(a student) began to experience emotional discomfort due to academic pressure, which seriously affected his studies. Today, Hui, accompanied by her family, went to the local mental health center for a consultation and got an appointment with Dr. Zhang, a psychiatrist. During the consultation, Dr. Zhang suggested that Hui complete a scale to assess the severity of depressive symptoms, which takes about 5 minutes. Hui scored 17 points on the scale. Dr. Zhang explained to Hui and her family in detail that the result indicated that Hui was suffering from moderate depression. Dr. Zhang provided Hui with some general information about MDD, prescribed an antidepressant, and advised him to make a follow-up appointment in three weeks.

When Hui returned for his follow-up appointment within three weeks, the clinic receptionist first gave him a scale in the waiting room and asked Hui to show the scale results to Dr. Zhang during the consultation. During the consultation, Hui, her family, and Dr. Zhang reviewed the results and discussed changes in symptoms and side effects of medications. Since Hui felt that the medication's side effects were bothering him, they discussed changing the medication.

2) eMBC instructions

The following is a short scenario describing a patient and his clinician using an “enhanced measurement-based care(eMBC)” intervention Please read the scenario before answering the questions:

Two months ago, Li(a student) felt that her emotional distress was getting worse. Li, accompanied by his family, went to a mental health center and visited Dr. Wang, a psychiatrist, for an outpatient appointment. During the appointment, Dr. Wang asked Li to complete a scale to assess depressive symptom severity, which takes about 5 minutes. Li scored 14 on the scale. Dr. Wang explained to Li and his family that the results indicated that he was suffering from moderate depression. At the same time, Dr. Wang provided Li with some general information about MDD and prescribed an antidepressant. Afterward, Dr. Wang showed Li and his family a smartphone app that would allow him to re-evaluate the same scale and save the results.

Dr. Wang asked Li to make an appointment for a follow-up consultation within three weeks and to use the mobile app to re-evaluate the scale before the consultation on that day. During the follow-up consultation, Li used his mobile phone to show Dr. Wang the scale scores. They discussed the changes in Li's symptoms, medication side effects, and the next treatment plan together.

Version for healthcare providers

1) MBC instructions

Measurement-based Care (MBC) refers to the regular use of validated questionnaires and scales to track changes in the severity of a patient's symptoms and side effects. These assessments can be clinician-administered (e.g., Hamilton Depression Rating Scale, HDRS), but more commonly, they are self-reported (e.g., Patient Health Questionnaire, PHQ-9). Throughout the treatment process, clinicians can use these assessments to support clinical decision-making.

2) eMBC instructions

We would like to know your views on using mobile technology to apply MBC. Please consider the following scenario: During the initial consultation, the psychiatrist asked the patient to complete the Patient Health Questionnaire-9(PHQ-9), and the patient received a score of 14, indicating moderate depression. In addition to the initial pharmacological treatment plan and simple mental health education, the patient was required to download a mobile app to re-evaluate the PHQ-9 scale and save the results. The psychiatrist asked her to make an appointment for a follow-up consultation within three weeks and to pre-assess the PHQ-9 scale on that day. At the follow-up consultation, the patient then showed the psychiatrist the PHQ-9 score from the mobile app.

Supplement 2 Patient acceptability of standard MBC and eMBC, n(%)

| Options | Response | Adult patients | Adolescent patients | Pediatric family members |
| --- | --- | --- | --- | --- |
| I would like to spend 5 minutes completing a questionnaire before each follow-up appointment with my doctor. | Strongly disagree | 3(1.1) | 6(4.2) | 1(0.9) |
| Disagree | 4(1.5) | 3(2.1) | 2(1.8) |
| Slightly disagree | 13(4.8) | 10(6.9) | 6(5.5) |
| Slightly agree | 23(8.5) | 24(16.7) | 12(11) |
| Agree | 153(56.7) | 77(53.5) | 62(56.9) |
| Strongly agree | 74(27.4) | 24(16.7) | 26(23.9) |
| Total Agree | 92.59% | 86.81% | 91.74% |
| I want to be more actively involved in my own treatment decisions for my depression. | Strongly disagree | 2(0.7) | 6(4.2) | 1(0.9) |
| Disagree | 4(1.5) | 4(2.8) | 0(0.0) |
| Slightly disagree | 1(0.4) | 9(6.3) | 0(0.0) |
| Slightly agree | 21(7.8) | 38(26.4) | 5(4.6) |
| Agree | 131(48.5) | 64(44.4) | 55(50.5) |
| Strongly agree | 111(41.1) | 23(16) | 48(44) |
| Total Agree | 97.41% | 86.81% | 99.08% |
| I believe documenting changes in my depressive symptoms with a short questionnaire would help me with my depression. | Strongly disagree | 2(0.7) | 6(4.2) | 0(0.0) |
| Disagree | 9(3.3) | 11(7.6) | 5(4.6) |
| Slightly disagree | 14(5.2) | 13(9) | 6(5.5) |
| Slightly agree | 34(12.6) | 42(29.2) | 17(15.6) |
| Agree | 131(48.5) | 52(36.1) | 56(51.4) |
| Strongly agree | 80(29.6) | 20(13.9) | 25(22.9) |
| Total Agree | 90.74% | 79.17% | 89.91% |
| I believe documenting changes in my depressive symptoms with a short questionnaire would help me and my doctor discuss my treatment for depression. | Strongly disagree | 2(0.7) | 6(4.2) | 0(0.0) |
| Disagree | 4(1.5) | 9(6.3) | 3(2.8) |
| Slightly disagree | 15(5.6) | 6(4.2) | 3(2.8) |
| Slightly agree | 29(10.7) | 37(25.7) | 16(14.7) |
| Agree | 136(50.4) | 65(45.1) | 59(54.1) |
| Strongly agree | 84(31.1) | 21(14.6) | 28(25.7) |
| Total Agree | 92.22% | 85.42% | 94.50% |
| I believe that using the questionnaire described in the scenario will help me understand my depression condition. | Strongly disagree | 2(0.7) | 7(4.9) | 1(0.9) |
| Disagree | 5(1.9) | 6(4.2) | 2(1.8) |
| Slightly disagree | 11(4.1) | 7(4.9) | 2(1.8) |
| Slightly agree | 33(12.2) | 41(28.5) | 11(10.1) |
| Agree | 140(51.9) | 65(45.1) | 65(59.6) |
| Strongly agree | 79(29.3) | 18(12.5) | 28(25.7) |
| Total Agree | 93.33% | 86.11% | 95.41% |
| I would be willing to use resources on the Internet, such as those described in the above scenario, to help me manage my depression. | Strongly disagree | 3(1.1) | 5(3.5) | 1(0.9) |
| Disagree | 10(3.7) | 12(8.3) | 4(3.7) |
| Slightly disagree | 22(8.1) | 13(9) | 7(6.4) |
| Slightly agree | 36(13.3) | 39(27.1) | 12(11) |
| Agree | 140(51.9) | 57(39.6) | 64(58.7) |
| Strongly agree | 59(21.9) | 18(12.5) | 21(19.3) |
| Total Agree | 87.04% | 79.17% | 88.99% |
| I am willing to use a phone app to track my symptoms if my doctor recommends it. | Strongly disagree | 3(1.1) | 5(3.5) | 1(0.9) |
| Disagree | 7(2.6) | 5(3.5) | 5(4.6) |
| Slightly disagree | 13(4.8) | 12(8.3) | 7(6.4) |
| Slightly agree | 37(13.7) | 36(25) | 13(11.9) |
| Agree | 131(48.5) | 69(47.9) | 66(60.6) |
| Strongly agree | 79(29.3) | 17(11.8) | 17(15.6) |
| Total Agree | 91.48% | 84.72% | 88.07% |
| I believe I could use a cell phone app to complete a short depressive symptom questionnaire regularly (e.g., every two weeks) | Strongly disagree | 2(0.7) | 5(3.5) | 1(0.9) |
| Disagree | 8(3.0) | 4(2.8) | 3(2.8) |
| Slightly disagree | 14(5.2) | 14(9.7) | 8(7.3) |
| Slightly agree | 43(15.9) | 39(27.1) | 20(18.3) |
| Agree | 136(50.4) | 62(43.1) | 63(57.8) |
| Strongly agree | 67(24.8) | 20(13.9) | 14(12.8) |
| Total Agree | 91.11% | 84.03% | 88.99% |

Supplement 3 Healthcare Providers' knowledge, confidence, and acceptance of MBC

| Response | Strongly disagree | Disagree | Slightly disagree | Slightly agree | Agree | Strongly agree | Total agree |
| --- | --- | --- | --- | --- | --- | --- | --- |
| Standardized questionnaires and scales are valid for assessing the severity of symptoms | 1(0.3) | 4(1.1) | 16(4.5) | 64(18) | 223(62.8) | 47(13.2) | 94.08% |
| MBC can improve patient prognosis | 1(0.3) | 10(2.8) | 26(7.3) | 86(24.2) | 192(54.1) | 40(11.3) | 89.58% |
| MBC helps make treatment decisions | 1(0.3) | 3(0.8) | 16(4.5) | 64(18) | 218(61.4) | 53(14.9) | 94.37% |
| The use of MBC at each visit helps to monitor treatment effects | 1(0.3) | 4(1.1) | 13(3.7) | 60(16.9) | 218(61.4) | 59(16.6) | 94.93% |
| MBC contributes to the reinforcement of patients' treatment. | 0(0.0) | 1(0.3) | 19(5.4) | 80(22.5) | 207(58.3) | 48(13.5) | 94.37% |
| Patients find MBC helpful. | 1(0.3) | 6(1.7) | 25(7) | 89(25.1) | 196(55.2) | 38(10.7) | 90.99% |
| MBC contributes to educating patients about their mental symptoms and illness. | 1(0.3) | 2(0.6) | 11(3.1) | 77(21.7) | 215(60.6) | 49(13.8) | 96.06% |
| MBC enables patients to have better engagement in medical decision-making. | 1(0.3) | 2(0.6) | 15(4.2) | 71(20) | 212(59.7) | 54(15.2) | 94.93% |
| MBC facilitates collaborative treatment with other healthcare professionals for the same patient. | 2(0.6) | 0(0.0) | 10(2.8) | 64(18) | 226(63.7) | 53(14.9) | 96.62% |
| MBC is highly important and valuable in aiding clinical decision-making | 4(1.1) | 3(0.8) | 11(3.1) | 84(23.7) | 207(58.3) | 46(13) | 94.93% |
| I have received training on using MBC and applying its results to guide clinical decision-making | 7(2) | 51(14.4) | 30(8.5) | 90(25.4) | 147(41.4) | 30(8.5) | 75.21% |
| I have enough knowledge to explain the MBC ratings | 4(1.1) | 19(5.4) | 34(9.6) | 97(27.3) | 165(46.5) | 36(10.1) | 83.94% |
| I use MBC to monitor the patient's therapeutic progress at each visit. | 6(1.7) | 38(10.7) | 63(17.7) | 94(26.5) | 131(36.9) | 23(6.5) | 69.86% |
| I will discuss the MBC score with the patient | 6(1.7) | 21(5.9) | 41(11.5) | 95(26.8) | 162(45.6) | 30(8.5) | 80.85% |
| MBC is easy to integrate into my daily workflow | 2(0.6) | 5(1.4) | 122(34.4) | 195(54.9) | 31(8.7) | 0(0.0) | 63.66% |
| If my hospital provides training and resources, I will use MBC | 2(0.6) | 8(2.3) | 58(16.3) | 236(66.5) | 51(14.4) | 0(0.0) | 80.85% |
| I will use the data collected from MBC to evaluate my clinical practice | 2(0.6) | 11(3.1) | 71(20) | 232(65.4) | 39(11) | 0(0.0) | 76.34% |
| My patients are willing to complete MBC at each follow-up visit | 3(0.8) | 25(7) | 134(37.7) | 166(46.8) | 27(7.6) | 0(0.0) | 54.37% |
| I will be more likely to use MBC if it's automated, electronic, and easy to explain. | 2(0.6) | 5(1.4) | 56(15.8) | 221(62.3) | 71(20) | 0(0.0) | 82.25% |
| I am too busy to know how to integrate MBC into my current workflow | 9(2.5) | 53(14.9) | 127(35.8) | 147(41.4) | 19(5.4) | 0(0.0) | 46.76% |
| The mobile app will make MBC easier to use | 2(0.6) | 3(0.8) | 14(3.9) | 68(19.2) | 206(58) | 62(17.5) | 94.65% |
| I would like to use MBC with my patients via a mobile app | 2(0.6) | 5(1.4) | 22(6.2) | 74(20.8) | 197(55.5) | 55(15.5) | 91.83% |
| My patients would find the above mobile app easy to use | 2(0.6) | 11(3.1) | 33(9.3) | 98(27.6) | 176(49.6) | 35(9.9) | 87.04% |
| My patients are willing to use the app to track their prognosis | 3(0.8) | 6(1.7) | 38(10.7) | 104(29.3) | 168(47.3) | 36(10.1) | 86.76% |
